# Supplementary material for: The effects of antenatal dietary and lifestyle advice for women who are overweight or obese on maternal diet and physical activity: the LIMIT randomised trial
Source: Springer Nature journal article supplement (doi:10.1186/s12916-014-0161-y), 2014-10-09
Supplement: MOESM5 [file 9758470]

**TABLE 1:** Demographic and clinical characteristics at trial entry

| ***Characteristic*** | ***Lifestyle Advice (N=974)*** | ***Standard Care (N=950)*** | ***Total (N=1924)*** |
| --- | --- | --- | --- |
| Maternal Age (Years)* | 29.4 ( 5.4) | 29.6 ( 5.4) | 29.5 ( 5.4) |
| Gestational Age at Entry (Weeks)+ | 14.3 (12.0-17.0) | 14.3 (12.0-17.1) | 14.3 (12.0-17.1) |
| Body Mass Index Category# |  |  |  |
| . BMI 25.0-29.9 | 410 (42.1) | 421 (44.3) | 831 (43.2) |
| . BMI 30.0-34.9 | 282 (29.0) | 268 (28.2) | 550 (28.6) |
| . BMI 35.0-39.9 | 180 (18.5) | 155 (16.3) | 335 (17.4) |
| . BMI >=40.0 | 102 (10.5) | 106 (11.2) | 208 (10.8) |
| Public Patient# | 954 (97.9) | 927 (97.6) | 1881 (97.8) |
| Caucasian# | 883 (90.7) | 866 (91.2) | 1749 (90.9) |
| Smoker# | 124 (12.7) | 97 (10.2) | 221 (11.5) |
| Nulliparous# | 410 (42.1) | 385 (40.5) | 795 (41.3) |
| Index of Socio-economic Disadvantage^ |  |  |  |
| . Unknown | 2 (0.2) | 1 (0.1) | 3 (0.2) |
| . Quintile 1 (Most Disadvantaged) | 296 (30.4) | 274 (28.8) | 570 (29.6) |
| . Quintile 2 | 231 (23.7) | 236 (24.8) | 467 (24.3) |
| . Quintile 3 | 157 (16.1) | 143 (15.1) | 300 (15.6) |
| . Quintile 4 | 138 (14.2) | 151 (15.9) | 289 (15.0) |
| . Quintile 5 (Least Disadvantaged) | 150 (15.4) | 145 (15.3) | 295 (15.3) |

* mean and standard deviation

+ median and interquartile range

# number and %

^ Socio-economic index of disadvantage as measured by SEIFA
